1 Discriminative feature of cells characterizes cell populations of interest by a small subset of  
2 genes

3

4 Takeru Fujii<sup>1,2,†</sup>, Kazumitsu Maehara<sup>1,†,\*</sup>, Masatoshi Fujita<sup>2</sup>, and Yasuyuki Ohkawa<sup>1,\*</sup>

5

6 <sup>1</sup>Division of Transcriptomics, Medical Institute of Bioregulation, Kyushu University, 3-1-1 Maidashi,  
7 Higashi-ku, Fukuoka 812-0054, Japan

8 <sup>2</sup>Department of Cellular Biochemistry, Graduate School of Pharmaceutical Sciences, Kyushu  
9 University, 3-1-1 Maidashi, Higashi-ku, Fukuoka 812-0054, Japan

10 † These authors contributed equally to this work.

11 \*Corresponding author: K.M. ([kazumits@bioreg.kyushu-u.ac.jp](mailto:kazumits@bioreg.kyushu-u.ac.jp)), and Y.O.  
12 ([yohkawa@bioreg.kyushu-u.ac.jp](mailto:yohkawa@bioreg.kyushu-u.ac.jp))

13 ***ABSTRACT***

14 Statistical methods for detecting differences in individual gene expression are indispensable for  
15 understanding cell types. However, conventional statistical methods have faced difficulties  
16 associated with the inflation of  $P$ -values because of both the large sample size and selection bias  
17 introduced by exploratory data analysis such as single-cell transcriptomics. Here, we propose the  
18 concept of discriminative feature of cells (DFC), an alternative to using differentially expressed  
19 gene-based approaches. We implemented DFC using logistic regression with an adaptive LASSO  
20 penalty to perform binary classification for the discrimination of a population of interest and variable  
21 selection to obtain a small subset of defining genes. We demonstrated that DFC prioritized gene  
22 pairs with non-independent expression using artificial data, and that DFC enabled to characterize the  
23 muscle satellite cell population. The results revealed that DFC well captured cell-type-specific  
24 markers, specific gene expression patterns, and subcategories of this cell population. DFC may  
25 complement differentially expressed gene-based methods for interpreting large data sets.

## 26 **INTRODUCTION**

27 Organisms are composed of various cell types with specific functions. The cell types also include  
28 undifferentiated cells, such as stem cells and progenitor cells, or cells in transition during  
29 differentiation. Understanding cell types as the functional or structural units of an organism can  
30 confer a comprehensive understanding of the functions of organs and tissues, as well as their origins.  
31 The classification and definition of cell types has been based on the identification of specific marker  
32 genes that define the cell type. Marker genes have been identified by comprehensive analysis of  
33 gene expression. Statistical tests are particularly important in the identification of marker genes, for  
34 which evaluation of differences in the mean expression levels of genes is often used.

35 Cell-type-specific genes/proteins are responsible for cell-type-specific functions. Therefore, to  
36 identify marker genes, comparisons have been performed between the cell types of interest and  
37 control groups to extract specifically expressed genes. The use of differentially expressed genes  
38 (DEGs) is a widely accepted way of defining marker gene candidates, the validity of which has been  
39 confirmed by biological experiments. However, the risk of false positives is increased by the tens of  
40 thousands of statistical tests associated with comprehensive analysis. Therefore, correction methods  
41 for multiple testing, such as Benjamini–Hochberg’s false discovery rate (FDR)<sup>1</sup>, Storey’s q-value<sup>2,3</sup>,  
42 and Efron’s local FDR<sup>4</sup> have been widely employed. Along with the increasing demand for multiple  
43 testing and correction methods, DEG detection methods in the field of biostatistics for  
44 high-dimensional data have also been developed. In particular, limma<sup>5</sup>, using Bayesian statistics,  
45 edgeR<sup>6</sup>, and DESeq1-2<sup>7,8</sup> have been developed to improve the statistical power (sensitivity) of DEGs  
46 while suppressing false positives. These methods have often been applied to cases in which only a  
47 small number of samples can be obtained because of the experimental scale and cost limitations<sup>9</sup>.

48 Nevertheless, with the development of comprehensive gene expression analysis, especially  
49 single-cell analysis<sup>10</sup>, new challenges have arisen as a result of the rapid increase in the number of  
50 samples<sup>11</sup> and the involvement of exploratory analysis schemes. The presence of a large sample size  
51 along with the application of exploratory analysis inducing selection bias can lead to an overly small  
52 P-value, impeding the application of conventional methods to call differentially expressed genes  
53 (DEGs) for bulk RNA-seq<sup>12</sup>. In particular, because in principle the P-value decreases with increasing  
54 sample size, even minor variations are considered statistically significant with large sample sizes,  
55 resulting in the unnecessary expansion of candidate genes (e.g., the definition of the *t*-statistic is  
56 proportional to  $\sqrt{n}$ ). Therefore, efforts to improve the ability to detect DEGs are still being made to  
57 adapt to scRNA-seq data with the characteristics of low coverage and large sample size. That is, one  
58 of the major problems to be solved in this field is gene prioritization, namely, the selection of a small  
59 list of genes that should be validated and interpreted as a priority.

60 Here, we propose discriminative feature of cells (DFC), an alternative approach to the use of DEGs  
61 for characterizing cell populations by discrimination and variable selection. We demonstrated that  
62 DFC succeeded in selecting a small set of genes that characterize a group of cells of interest, while  
63 avoiding the problem of a large candidate gene list due to the large sample size of scRNA-seq. DFC  
64 is also shown to have the potential to provide biological insights that are difficult to find using DEGs,  
65 such as detecting genes that characterize small subpopulations and specific compositions of genes  
66 that are functionally linked to each other.

## 67 **RESULTS**

68 We focused on the discriminative method to characterize a population of interest (POI) in cells (e.g.,  
69 stem cell population), using scRNA-seq data from samples that contain a large number of cell types,  
70 such as tissues. In the discriminative method, each cell is considered as a data point in the gene  
71 expression space, and the boundary surface that separates the two groups is determined. The  
72 boundary surface is confined to a small dimension of the space by variable selection, which suggests  
73 the idea of characterizing cell populations by a selected subset of gene expression patterns, as DFC.  
74 (Fig. 1a). While the conventional concept of using a DEG-based approach involves the comparison  
75 of group means of individual gene expression levels in two cell populations, the POI and a control  
76 group, DFC obtains a group of genes that are useful to discriminate POI from the control group.  
77 Thus, DFC is supposed to provide a highly selective gene list of only the number of genes needed  
78 for discrimination, while simultaneously using information from all genes. In this study, we  
79 implemented the method for determining DFC using binary classification by logistic regression and  
80 variable selection by adaptive LASSO<sup>13</sup>. Specifically, we performed adaptive LASSO–logistic  
81 regression with the objective variable of belonging to the POI (1 or 0) and the explanatory variable  
82 of gene expression level; the genes whose weights were not 0 were considered as DFC.

83 First, we explored which characteristics of the POI are considered important by DFC. Because  
84 DFC could be related to multiple variables, it could potentially distinguish correlated gene pairs or  
85 mixed subpopulations. Therefore, we generated artificial scRNA-seq data assuming the above two  
86 scenarios of gene expression pattern that may be prioritized in DFC. We applied variable selection  
87 using adaptive LASSO–logistic regression on these artificial data to examine the characteristics of  
88 gene expression patterns of cell populations that tend to be DFC.

89

90 **DFC calls a pair of genes with dependences in their expression**

91 In the first case, we tested the possibility that adaptive LASSO would prioritize correlated gene  
92 pairs. As the gene expression pattern of a simulated cell population, the expression levels of four  
93 genes were generated from a normal distribution with equal differences in group means and identical  
94 variances (Fig. 1b). Therefore, all genes are equivalent as DEGs (i.e., they have the same P-value in  
95 the two-tailed t-test). However, only the gene pair  $X_3$ - $X_4$  is correlated ( $r=0.7$ ) within the two groups,  
96 while all other pairs are uncorrelated ( $r=0$ ). The expression of these hypothetical genes is shown in  
97 Figure 1c as a scatter plot. The process of variable selection (LASSO solution path) is shown in  
98 Figure 1d, indicating that, in the process of increasing the parameter  $\lambda$ , which adjusts the sparsity  
99 (the strength of variable selection), the correlated  $X_3$ - $X_4$  pair is finally selected (Fig. 1d). The  
100 correlated pair has the clearest boundary between the groups (Fig. 1c, bold box), and it can be  
101 intuited that the two selected variables are a useful variable pair for differentiating groups A and B.  
102 In addition, the accuracy of the discrimination using all four variables is 0.999, while the accuracy  
103 using only the two selected variables is 0.995, indicating that the model maintains adequate  
104 performance. These results indicate that gene pairs that are correlated within a group are likely to be  
105 selected as DFC. This suggests that DFC can select a set of genes that have direct or indirect  
106 dependences as useful features for discriminating groups.

107 Next, we examined the ability of DFC to detect mixed subpopulations. Here, we assume a situation  
108 that includes multiple subpopulations with different expression patterns in one group (Fig. 1e). As in  
109 the previous scenario, all genes are equivalent as DEGs, that is, they have the same variance, and the  
110 group means are the same for all variables (see Methods for details). Here, genes  $X_1$  and  $X_2$  are  
111 strongly expressed in only one-third of the cells in group B. Furthermore, the expression of  $X_1$  and  
112 that of  $X_2$  are mutually exclusive. Therefore,  $X_1$  and  $X_2$  are not statistically independent. In addition,

113 because group B is composed of multiple subpopulations, the distributions of gene expression of  
114 both  $X_1$  and  $X_2$  are multimodal (Fig. 1f). In this example, adaptive LASSO also prioritized the  
115 non-independent variable pair  $X_1$  and  $X_2$  (Fig. 1g). This suggests that DFC is generally prone to  
116 selecting non-independent pairs of genes. In this scenario, the condition for being in cell group A is  
117 the expression of both  $X_1$  and  $X_2$  at the same time, that is, the logical AND (&) relation, which  
118 cannot be realized by expressing  $X_1$  or  $X_2$  alone.

119 These results suggest that DFC may provide useful insights when considering cellular functions,  
120 not simply as a candidate list of differentially expressed genes, but as a set of genes that well defines  
121 characteristics of a cell population, including dependences such as correlations among multiple  
122 genes and mixtures of different populations.

## Fig1\_Fujii

**a**

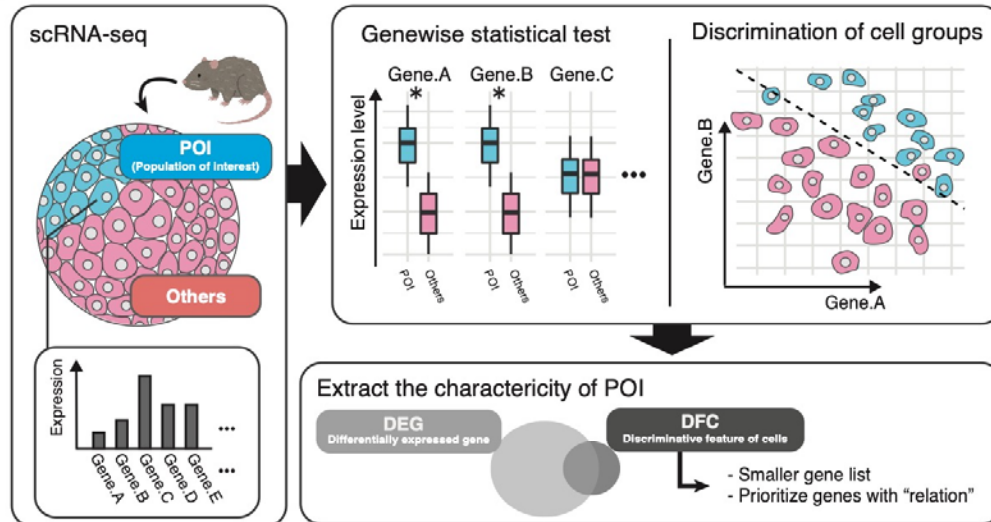

**b**

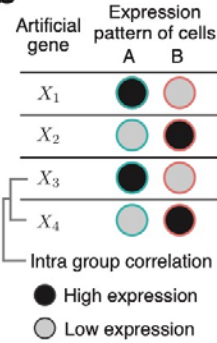

**c**

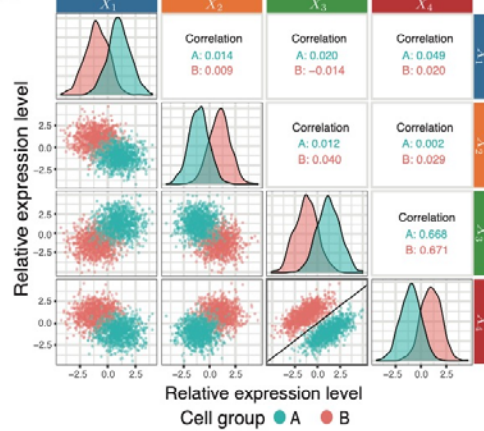

**d**

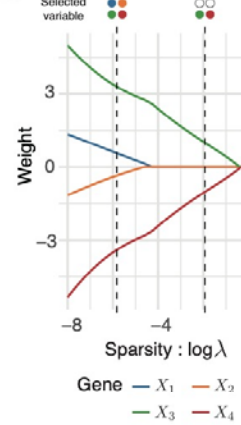

**e**

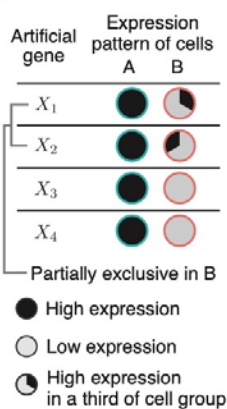

**f**

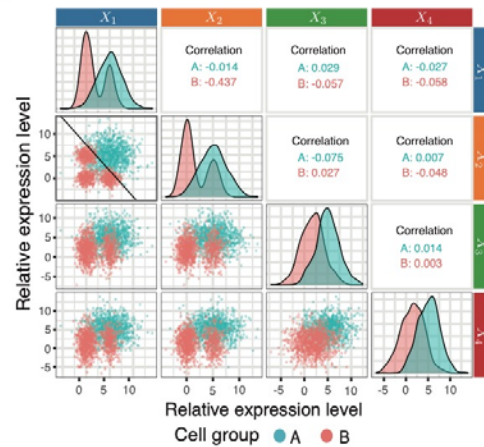

**g**

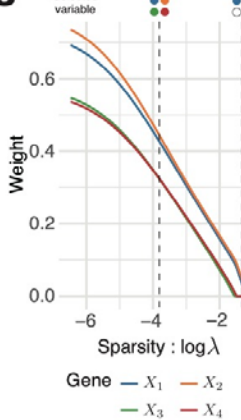

123

124 Fig. 1: The dependent pairs of gene expression selected as the DFC



125 (a) Different concepts for gene selection of DFC and DEG. The common goal is to extract a set of  
126 genes that characterizes the population of interest. A DEG-based approach involves a list of genes  
127 with statistically significant differences between the studied groups. In contrast, DFC-based  
128 approach involves a subset of genes that distinguish between two populations. DFC is expected to  
129 feature a small set of genes selected by taking into account the relationships among genes. (b–d)  
130 Artificially generated data set in which DFC has priority over DEG; case 1: correlation. (b)  
131 Schematic of the synthesized data design. Only the pair  $X_3$  and  $X_4$  has intra-group correlation; the  
132 other pairs are independent. All variables have the same variance, and the differences in means are  
133 the same for all pairs (see Methods for details). (c) Pairs that are easier to classify are given priority  
134 to become DFCs. The lower triangle shows the plot of each pair of variables; the diagonal elements  
135 show the distribution of each variable and the upper triangle shows the correlation coefficient within  
136 the cluster of each two variables. The separating boundary of the selected variable pair  $X_3$  and  $X_4$  is  
137 shown as solid line. (d) The process of selecting discriminative variables; solution path. This  
138 indicates transition of the weights (partial regression coefficients) of each variable when  
139 regularization parameter  $\lambda$  (sparsity) is varied. (e–g) Synthesized data set in which DFC has priority  
140 over DEG; case 2: exclusive. (e) Schematic of the synthesized data design. In one-third of the group  
141 A cells, the expression of  $X_1$  and that of  $X_2$  are mutually exclusive. The variances and the means of  
142 variables are designed as in case 1. In other words, this simulates a logical product relationship such  
143 that cells that express  $X_1$  and  $X_2$  simultaneously are equivalent to the population of group A. (f) An  
144 example of logical relationships of case 2, shown in a scatter plot as in (c). (g) The solution path in  
145 case 2 as shown in (d).

146 **Small gene set of DFC determined by a unique criterion that differs from DEG**

147 Next, to demonstrate the practical applicability of DFC, we performed scRNA-seq data analysis  
148 and compared the yielded gene lists of DEG and DFC. The data were obtained from scRNA-seq data  
149 of mouse tibialis anterior (TA) muscle tissue injured by notexin at days 0, 2, 5, and 7 during the  
150 regeneration of skeletal muscle<sup>14</sup>. Skeletal muscle satellite cells (MuSCs) are known to be an  
151 essential cell population for muscle regeneration, and are activated upon muscle injury and undergo  
152 multiple progenitor cell stages until differentiating into myofibers. In this process of muscle  
153 regeneration, there is also a self-renewing state in which MuSCs again transition to a quiescent state  
154 and refill the MuSC pool<sup>15,16</sup>. Therefore, we attempted to characterize heterogeneous cell  
155 populations of MuSCs with multiple transient states by DFC, which has been difficult to capture by  
156 a DEG-based approach.

157 Figure 2a shows the procedure for defining the POI and the determination of DFC. First, public  
158 data of scRNA-seq (GSE143437)<sup>14</sup> were obtained. Then, the genes expressed in very few cells  
159 (fewer than 10 cells) were filtered (see Methods for details). Next, UMAP was used to visualize the  
160 data in two dimensions. The 12th cluster obtained by Louvain clustering (Fig. 2b) was designated as  
161 the POI for this analysis, and all other clusters were designated as the control group (Fig. 2c).  
162 Cluster 12 was selected according to the expression levels of *Pax7*, a marker gene for MuSCs, and  
163 *Myod1*, a transcription factor that functions in progenitor cells and activated satellite cells. The  
164 specific expression of the genes indicated that cluster 12 is the satellite/progenitor cell cluster (Fig.  
165 2d, e).

166 Next, to elucidate the differences in the criteria for selecting genes in DFC and DEG in the data, we  
167 compared their gene lists. For DEGs, the criterion of  $FDR < 0.01$  in DESeq2 was used. As a result of  
168 applying this criterion, the number of DEGs was 7,495, which was nearly half of the total (42%) of

169 17,730 mouse genes. Among the DFCs, most of the genes (96/108) overlapped with the DEGs, but  
170 there were also 12 DFC-specific genes (Fig. 2f). Next, we examined whether genes in DFC could be  
171 obtained by adjusting the gene selection criteria such as the P-value and log<sub>2</sub> fold change in DEGs.  
172 Figure 2g shows the position of genes selected as DFC among all DEGs by a volcano plot. The large  
173 sample size of scRNA-seq and the statistical test on the clusters, which were also determined using  
174 the same scRNA-seq data, resulted in the overly small FDRs. In addition, the genes selected as DFC  
175 among the DEGs were scattered irregularly. The results suggested that genes in DFC were selected  
176 independently of the DEG criteria. Similarly, in the MA plot (Fig. 2h), genes in DFCs were found to  
177 be scattered among the DEGs, indicating that the DFC selection was also independent of the gene  
178 expression levels. These results indicate that DFC selects genes according to its own criteria and also  
179 selects genes that are more useful for discrimination of the POI among the DEG candidates.

## Fig2\_Fujii

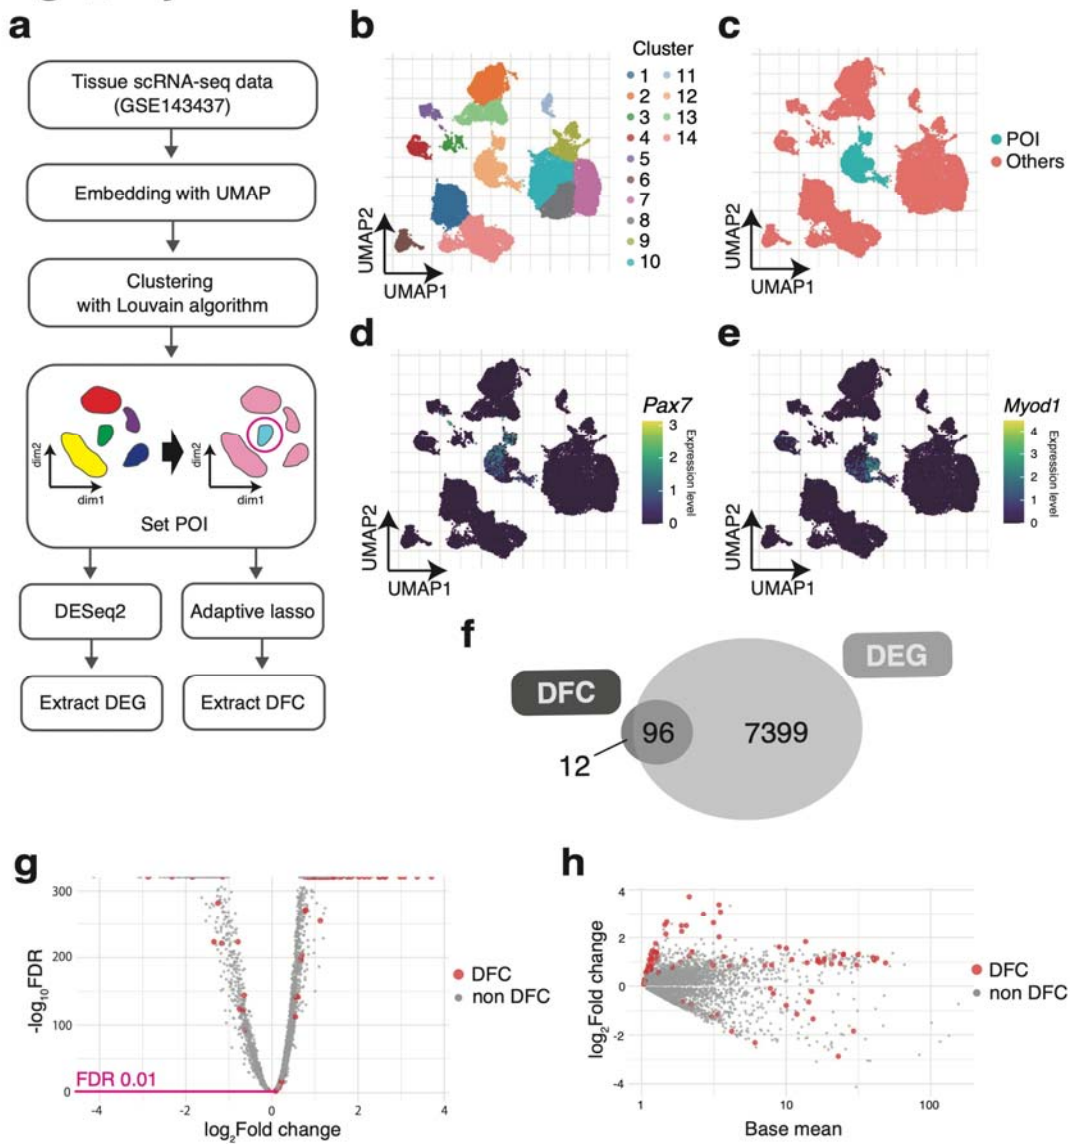

180

181 Fig. 2: Smaller gene set of DFC was selected by a unique selection criterion

182 (a) Procedure of extracting DEG and DFC from scRNA-seq data. (b–e) The determined POI is  
 183 compared with all other cell clusters in the muscle tissue. Embedding the scRNA-seq data into  
 184 two-dimensional space with UMAP. (b) The clusters determined by the Louvain algorithm. The 12th  
 185 cluster corresponds to the cluster of muscle stem cells and progenitors. (c) The 12th cluster is set as  
 186 the POI, and the other clusters are assigned as the control group, “Others.” (d, e) Single-cell

187 expression levels for *Pax7* and *Myod1*. (f) A part of the DEGs are selected as DFC. Venn plot  
188 indicating the overlap of DEGs and DFC. (g) Genes in DFC not selected by the DEGs' criteria.  
189 Volcano plot of DEGs and (h) MA plot of DEGs.

190 **DFC is useful to identify the combinatorial patterns of gene expression and minor**  
191 **subpopulations**

192 Next, we investigated whether DFC can extract the biological function of the POI. To evaluate this,  
193 we interpreted how genes in DFC help to discriminate the POI by referring to known marker genes  
194 of MuSC or muscle progenitors. First, we classified the DFC genes into three groups according to  
195 the specificity of expression in each cluster: The “Strong” feature refers to the genes expressed in  
196 25% or more of the cells in one or two clusters. The “Weak” feature refers to the genes expressed in  
197 three or more clusters, as depicted in Figure 3a. The “Niche” feature is defined as genes with minor  
198 expression in less than 25% of the cells in all clusters (Fig. 3b for the annotation of clusters, Fig. S1  
199 for the original annotation by the authors of scRNA-seq data and S2-3 for highlighted expression of  
200 all genes in DFC on the UMAP visualization).

201 Genes belonging to the Strong feature included many of the genes known as markers of MuSCs  
202 and activated satellite cells (Fig. 3c, Fig. S3a). M-cadherin (*Cdh15*)<sup>17</sup> was expressed almost  
203 universally in the POI. The results of GO enrichment analysis using only the Strong feature showed  
204 that many genes are related to skeletal muscle cells in muscle tissue (Fig. 3d). In addition, *Myf5* is a  
205 representative feature of the group of cells that are not represented by *Myog* and *Myod1* in the POI  
206 (Fig. S3a). Thus, it can be interpreted that *Myf5* plays a different role from other myogenic  
207 regulatory factors<sup>18</sup>. These results indicate that DFC can select genes that correspond to single  
208 biomarkers, similar to DEG.

209 The Weak feature (Fig. 3e, Fig. S2) included Kai (*Cd82*)<sup>19-21</sup> and a group of genes used as  
210 quiescent satellite cell markers such as syndecan-4 (*Sdc4*). In contrast, the negative LASSO weight  
211 of *Col6a2*, which is selectively expressed in fibro/adipogenic progenitors (FAPs), helps to  
212 characterize the POI as non-FAPs (Fig. 3e). Furthermore, a notable property of the Weak feature

213 involved the combined expression pattern using multiple genes. For example, *Des* is expressed in  
214 both a part of the POI and the mature SKM population, which is a part of Others. This means that  
215 *Des* itself cannot characterize the POI (Fig. 3g, Fig. S2). Therefore, to exclude the character of  
216 mature SKM from the POI, the condition of *Sepw1(-)*, which is significantly expressed in mature  
217 SKM, is additionally imposed (Fig. 3f). Thus, DFC can be used as a molecular marker to identify  
218 specific cell types for immunostaining and cell sorting, for example, *Des(+)**Sepw1(-)**Col6a2(-)*.

219 The Niche feature detects minor subpopulations scattered within the POI (Fig. 3h). These genes in  
220 DFC are difficult to prioritize in the list of DEG (i.e., they tend to have larger P-values). In fact,  
221 *Calcr*, which is ranked lower than 5,000th in the order of *P*-values in the DEGs, is known to be  
222 expressed transiently in a quiescent state. We also detected *Edn3*<sup>22</sup>, which has a prominent  
223 localization on day 7 after injury in the POI, and *Gm12603* (*Wincrl1*; WNT-induced noncoding RNA),  
224 a gene expressed in a different cell group from *Calcr* and *Edn3*.

225 These binary combinations (+/-) of multiple genes and minor cell groups would appear as the  
226 representative cases demonstrated in Figure 1f. Therefore, DFC can characterize the best  
227 combinations of genes for determining cell type and even small subpopulations caused by transient  
228 expression or state changes, even using a small list of genes, and even upon comparison with the  
229 heterogeneous control group of cells in tissue.

## Fig3\_Fujii

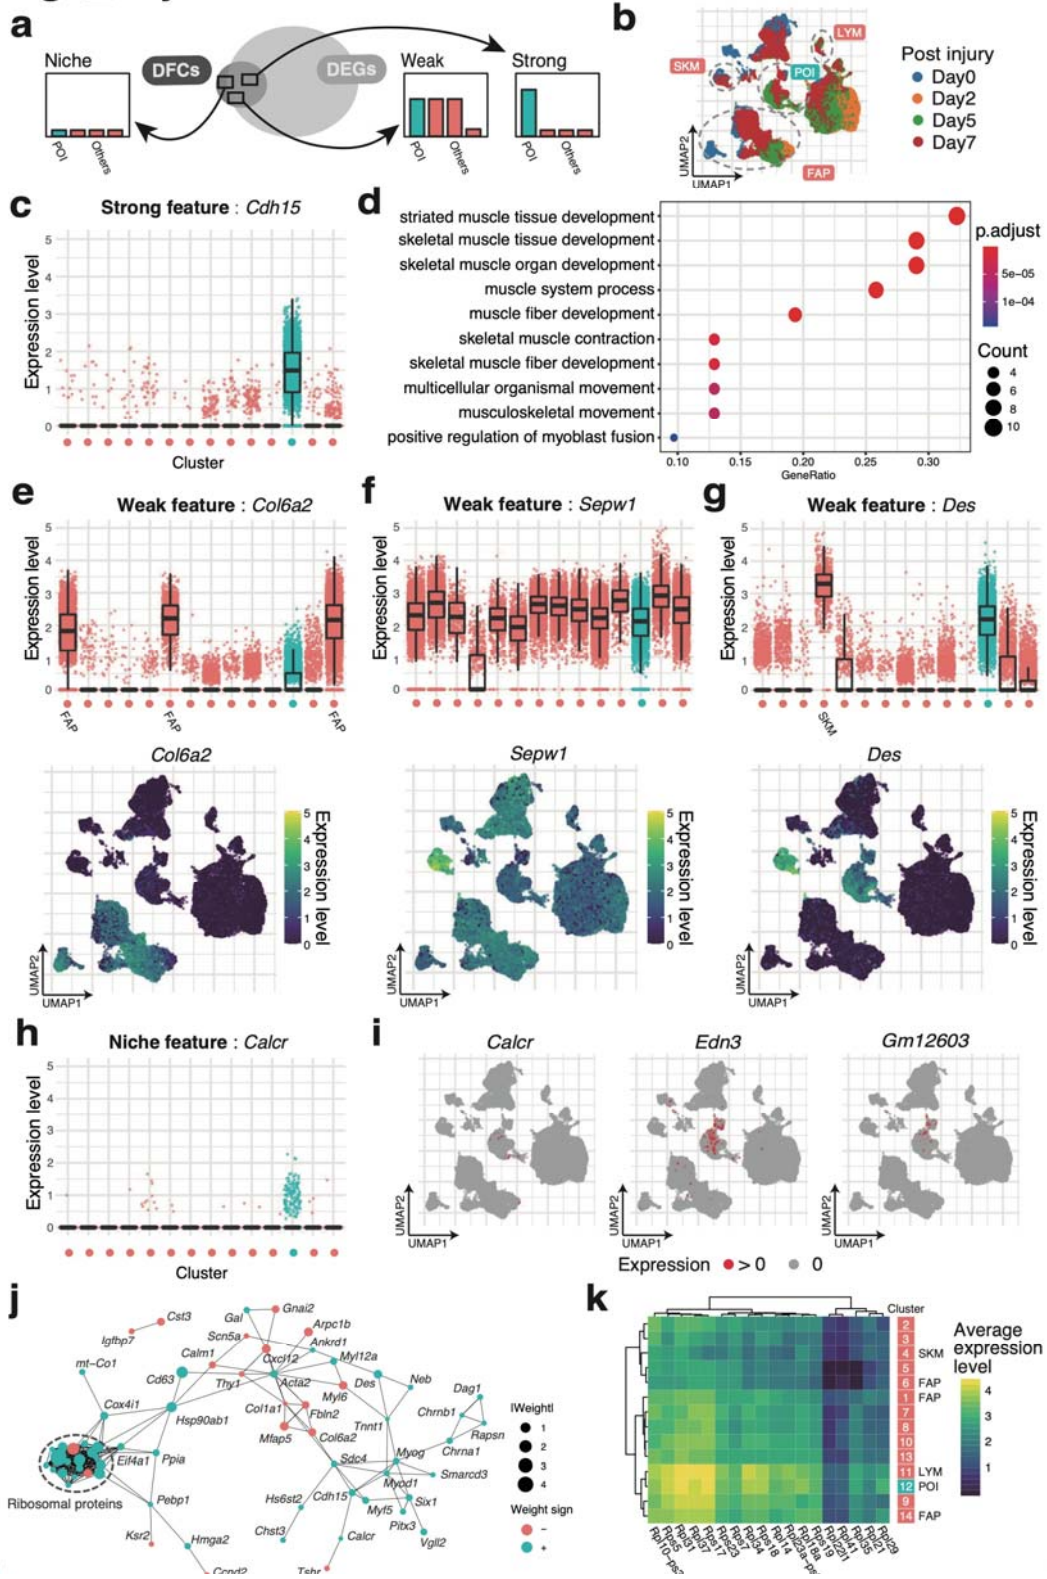

230



231 Fig. 3: Biological significance of genes in DFC revealed by the discriminative ability

232 (a) According to the specificity of the expression, the genes in DFC are classified into three groups.

233 The three groups are named Strong (specific to 1–2), Weak (>2), and Niche features (none of them).

234 (b) The data are from samples collected at 0, 2, 5, and 7 days after skeletal muscle injury. In addition,

235 the clusters of fibro/adipogenic progenitor (FAP), mature skeletal muscle (SKM), and lymphocytes

236 (LYM) are shown. (c) Genes specifically expressed in the POI are assigned to the Strong features.

237 For the Strong feature *Cdh15*, its expression level for each cluster shown in Fig. 2b is plotted. The

238 medians, 25/75th percentiles, and 1.5 IQR (inter-quartile range) are employed to draw the box plots.

239 (d) The Strong features contain many genes that act as markers of skeletal muscle. The results of GO

240 enrichment analysis for the Strong features. GOs are ordered by the proportion of their inclusion in

241 the Strong features. (e) Genes expressed in some clusters are assigned to the Weak features. For the

242 Weak feature *Col6a2*, its expression level is plotted in the upper panel, and the single-cell expression

243 level on UMAP visualization is plotted in the lower panel. (f, g) The expression levels of *Sepw1* and

244 *Des*, two of the Weak features, are plotted as (e). (h) Genes with low expression levels that are

245 expressed in a minor subpopulation of the POI are assigned to the Niche feature. For the Niche

246 feature *Calcr*, its expression level is plotted as (e). (i) Cells expressing Niche features (*Calcr*, *Edn3*,

247 and *Gm12603*) are highlighted. (j) DFCs have the property of capturing interrelated genes. STRING

248 is used to connect related DFCs. (k) Ribosomal proteins are a notable example of Weak features in

249 DFC that are difficult to interpret in the context of binary combinations. Eighteen ribosomal protein

250 genes in DFC are averaged in each cluster as a heat map.

251 **DFC extracts genes harboring functional associations**

252 Finally, we attempted to elucidate more complex functional associations between genes from the  
253 obtained DFC. The artificial data in Figure 1 show that DFC selects the pair of genes with  
254 dependences among DEG-equivalent genes. This suggests that DFCs may tend to contain the  
255 network of many-to-many gene relations that forms the unique characteristics of each cell type.

256 First, we examined the correlation matrix of expression levels for the genes in DFCs, and found that  
257 the POI showed a more distinct hierarchical structure than the Others group (Fig. S4). We further  
258 evaluated the functional associations of 108 genes by STRING<sup>23</sup> (see Fig. 3j, Fig. S5–6 for details).  
259 The 104 genes in DFC were contained in the STRING database and had 257 association edges,  
260 which is a larger number than would occur by chance (87 edges), indicating that these are a set of  
261 genes that are strongly related to each other (PPI enrichment p-value < 10<sup>-6</sup>).

262 Next, we attempted to interpret the network by referring to the characteristics of the adaptive  
263 LASSO–logistic regression. First, we examined the correspondence with the weights of adaptive  
264 LASSO. We found that the two clusters of genes related to the function of FAPs with negative  
265 weights and the clusters of genes related to the activation of MuSCs with positive weights, such as  
266 *MyoD* and *Myog*, were linked via the proteoglycan *Sdc4* (Fig. 3j). Among them, the most remarkable  
267 result was obtained for the ribosomal protein-coding genes, which formed a dense cluster of  
268 ribosome subunit components. All of these genes are included in the Weak feature. The expression  
269 patterns of these genes are not clearly segregated into clusters and are difficult to interpret by binary  
270 combinations (Fig. S2), suggesting that they reflect a certain composition of ribosomal  
271 protein-coding genes that may have a critical function in MuSCs and progenitors. To confirm the  
272 discriminative ability of the genes, we extracted only the ribosomal protein-coding genes in the DFC,  
273 and visualized them by PCA. The results confirmed that the subset of DFC was sufficient to

274 discriminate the POI from the Others (Fig. S7a, b). In more detail, the composition of these genes  
275 was characterized by higher overall expression levels compared with the Others, with *Rpl31* and  
276 *Rps37* being particularly highly expressed (Fig. 3k). In contrast, the POI has a ribosomal protein  
277 profile closest to that of lymphocytes (LYM), but the negative weight of *Rpl34* appears to act to  
278 differentiate the POI from the lymphocyte population. Furthermore, these ribosomal protein-coding  
279 genes clearly captured the temporal changes after muscle injury in the POI (Fig. S7c, d). This  
280 suggests that a certain composition of ribosomal protein-coding genes is the critical factor in stem  
281 cell functions, such as self-renewal<sup>24-26</sup>, and supports their role in muscle regeneration<sup>27</sup>. In  
282 conclusion, DFC can extract a small set of genes that characterize the POI, including functional  
283 associations between genes.

## 284 ***DISCUSSION***

285 In this paper, we have proposed a new concept of characterizing a cell population of interest, which  
286 is an alternative to the DEG-based approach that uses lists of genes with differences in expression  
287 between groups. Our method, can be termed a discriminative approach, has potential applications in  
288 the task of cell characterization. In particular, given the recent developments of high-throughput  
289 biological measurements, the statistical models based on discrimination can be effective for the  
290 increased sample size of scRNA-seq (capable cell number).

291 To select a small number of genes to characterize a cell, as in a DEG-based approach, rather than to  
292 determine the cell type itself, a variable selection procedure was employed to select a small set of  
293 genes that are effective for discrimination. Variable selection is a methodology that selects a small  
294 number of  $M < N$  optimal combinations of variables from  $N$  input variables, while preserving the  
295 predictive performance of the statistical model. Several methods of variable selection with  
296 discriminative models have been developed, such as SVM<sup>28</sup>, and logistic regression with LASSO  
297 penalty. Among them, LASSO–logistic regression is a method that can construct an interpretable  
298 linear model and perform variable selection in one step. However, the gene clusters obtained by  
299 these discriminative methods have been mostly used as gene signatures in cell-type classification  
300 (e.g., a cell is normal or malignant<sup>29</sup>), and no attempt has been made to interpret these gene  
301 signatures themselves biologically.

302 In this study, we compared two different population groups: the POI, which is specified after  
303 nonlinear dimensionality reduction and clustering, and the rest of the population. In this paper, this  
304 comparison was assumed to be the most frequently used procedure for profiling unknown cell  
305 populations using scRNA-seq data. However, DE analysis after clustering has been criticized for  
306 introducing selection bias, which results in excessively low P-values<sup>12</sup>. This exploratory data

307 analysis of scRNA-seq makes the proper use of P-values more difficult, while our method bypasses  
308 the use of P-values. In addition, it can be assumed that a control group including heterogeneous  
309 populations will increase the variance in the group and lead to large P-values. For this reason, DE  
310 may miss subtle changes of state or fail to discover minor subpopulations within the cell groups of  
311 interest. In other words, calling DEGs may not be the best strategy for exploratory discovery in a  
312 mixed cell population represented by tissue. Furthermore, a simple two-group comparison of one vs.  
313 others is practical enough and thus is one of the major advantages of our method. The reason why  
314 this easy comparison works well is that DFC combines multiple Weak/Niche features in order to  
315 improve discriminative performance and pick up even small populations. The advantage comes from  
316 the linearity of the model adapted in DFC; that is, the results can be interpreted as a superposition of  
317 features, as described above.

318 As an implementation of the concept of DFC, we employed the framework of binary classification  
319 with logistic regression and variable selection with adaptive LASSO. In addition to its several  
320 beneficial statistical properties (e.g., consistency in variable selection), adaptive LASSO has been  
321 shown to have superior practical performance among the improved versions of original LASSO<sup>30</sup>.  
322 Although there are many methods for variable selection, such as best subset selection (L0)<sup>31</sup>, random  
323 forest<sup>32</sup>, and SVM<sup>28</sup>, in this study, we did not provide the benchmark tests of each method. However,  
324 we believe that how the mathematical properties of each method are utilized in the various scenarios  
325 of scRNA-seq data analysis is an important topic. In this paper, we have discussed the usefulness of  
326 the discriminative method when the dependence among all genes is included. Indeed, Ntranos et al.  
327 shed light on a discriminative approach that uses logistic regression to detect isoform-level gene  
328 expression changes from scRNA-seq data<sup>33</sup>. We also found the usefulness of the discriminative  
329 approach, especially in the analysis of tissue scRNA-seq data where gene expression correlations

330 and subpopulations within the same population are expected to be mixed. The further development  
331 of methods that focus on the interpretation of large-scale data is anticipated.

332

## 333 **MATERIALS & METHODS**

### 334 **Setting POI of scRNA-seq data**

335 Normalized count matrix and the annotations of cells of scRNA-seq data were downloaded  
336 from GEO (GSE143437). We filtered out genes that were expressed ( $> 0$ ) in fewer than 10 cells.  
337 The UMAP visualization was performed using the *uwot* R package (version 0.1.10)<sup>34</sup>. In the  
338 embedded two-dimensional space, the clusters were determined by the Louvain method<sup>35</sup>  
339 implemented in the *igraph* R package<sup>36</sup> (version 1.2.6). In our analysis of scRNA-seq data from  
340 muscle tissue, the POI was set as the cluster in which the majority of cells expressed both *Pax7*  
341 (53.3%) and *Myod1* (42.6%).

342

### 343 **Adaptive LASSO–logistic regression**

344 The adaptive LASSO–logistic regression was performed using the *glmnet*<sup>37</sup> (version 4.1) R  
345 package. To perform the adaptive LASSO, we followed the two steps of parameter estimation:  
346 fit ridge and then fit LASSO regression with the penalty factor. The penalty factor was set to be  
347  $1/|\beta_{\text{ridge}}|$ , where  $\beta_{\text{ridge}}$  is estimated by ridge regression in the first step. The sparsity parameter  $\lambda$   
348 was determined by 10-fold cross-validation (*cv.glmnet*) of binomial deviance. To reduce the  
349 computational cost in real scRNA-seq data, we obtained 30% subsamples of cells from each  
350 cluster in the estimation of  $\beta_{\text{ridge}}$ .

351

## 352 **Differential expression analysis**

353 A raw count matrix was downloaded from GEO (GSE143437). The Wald test was performed  
354 using the *DESeq2*<sup>38</sup> (version 1.28.1) R package to identify genes that were differentially  
355 expressed (DEGs) between the POI and the Others. The parameters were used as the default  
356 settings. Genes with FDR < 1% were considered significantly differentially expressed.

357

## 358 **Synthetic data generation**

359 The artificial data set consists of randomly generated data points (cells) with four variables  
360 (genes). We set the variables as the *equivalent genes* in terms of DE. Because the statistical  
361 significance of a DEG that is estimated by the *z*- or *t*-statistic is uniquely determined by  
362 variances and the difference of means between groups, we only modified the relationships of the  
363 genes, while maintaining the variance and difference of means. Specifically, the two cases of  
364 DE-equivalent genes were generated as follows. Case I: Correlated expression. All four  
365 variables follow the Gaussian distribution with constant variance  $\sigma^2 = 1$  and difference of means  
366  $|\mu_A - \mu_B| = 2$ , where A and B indicate groups of cells (each of 1,000 cells). All pairs of variables  
367 are independent ( $r=0$ ), except for the pair ( $X_3, X_4$ ) having a strong correlation  $r=0.7$  in both  
368 groups. Case II: Heterogenous population. All four variables have the same variance  $\sigma^2$  and the  
369 same group means  $\mu_A, \mu_B$ . We set  $X_1$  and  $X_2$  of group B as having an exclusive relationship. We  
370 divided group B into three subgroups (B1–3: each of 333 cells). Group B1 expresses  $X_1$ , group  
371 B2 expresses  $X_2$ , and group B3 expresses none of them. The others are independent Gaussian

372 variables. To equalize the variance and means in group B to those in the others, we used the  
373 mixture distribution as the marginal distribution of  $X_1$  and  $X_2$  in B:

$$374 \quad f = pg(\mu_1, \sigma_1^2) + (1 - p)g(\mu_2, \sigma_2^2),$$

375 where  $g$  is the Gaussian probability density function and  $p$  is the proportion of subgroup relative  
376 to the size of group B. In general, the mean and variance of  $f$  are calculated as follows:

$$\begin{aligned} \mu &= p\mu_1 + (1 - p)\mu_2 \\ \sigma^2 &= p\sigma_1^2 + (1 - p)\sigma_2^2 + p(1 - p)(\mu_1 - \mu_2)^2. \end{aligned}$$

377 We used the parameters:  $\sigma_1^2 = \sigma_2^2 = 1$ ,  $\mu_1 = 0$ ,  $\mu_2 = 5$ ,  $p = 2/3$ , and hence  $\mu_B = 5/3$  and  $\sigma^2 = 59/9$   
378 for all variables. We set  $\mu_A = 5$ .

379

### 380 ***Code Availability***

381 The codes used for the DFC extraction and analysis are available at:

382 <https://github.com/tfwis/DFC>

383

### 384 ***ACKNOWLEDGMENTS***

385 Computations were carried out using the computer resources offered under the category of  
386 Intensively Promoted Projects by the Research Institute for Information Technology at Kyushu  
387 University. This work was supported in part by JST PRESTO JPMJPR2026 to K.M.; JST  
388 CREST JPMJCR16G1 to Y.O.; MEXT/JSPS KAKENHI JP19H04970, JP19H03158, and  
389 JP20H05393 to K.M.; and JP18H04802, JP18H05527, JP19H05244, JP17H03608, JP20H00456,



390 and JP20H04846 to Y.O. The authors thank Edanz (<https://en-author-services.edanz.com/ac>) for  
391 editing the English text of a draft of this manuscript.

392

### 393 ***AUTHOR CONTRIBUTIONS***

394 T.F. and K.M. analyzed the data. K.M. performed statistical analysis. T.F., K.M., M.F., and Y.O.  
395 wrote the paper. All authors read and approved the final manuscript.

396

### 397 ***REFERENCES***

- 398 1. Benjamini, Y. & Hochberg, Y. Controlling the False Discovery Rate: A Practical and Powerful  
399 Approach to Multiple Testing. *J. R. Stat. Soc. Ser. B* **57**, 289–300 (1995).
- 400 2. Storey, J. D. & Tibshirani, R. Statistical significance for genomewide studies. *Proc. Natl. Acad.*  
401 *Sci. U. S. A.* **100**, 9440–9445 (2003).
- 402 3. Storey, J. D. The positive false discovery rate: a Bayesian interpretation and the q -value. *Ann.*  
403 *Stat.* **31**, 2013–2035 (2003).
- 404 4. Efron, B., Tibshirani, R., Storey, J. D. & Tusher, V. Empirical bayes analysis of a microarray  
405 experiment. *J. Am. Stat. Assoc.* **96**, 1151–1160 (2001).
- 406 5. Ritchie, M. E. *et al.* Limma powers differential expression analyses for RNA-sequencing and  
407 microarray studies. *Nucleic Acids Res.* **43**, e47 (2015).
- 408 6. MD Robinson, D. M. G. S. edgeR: a Bioconductor package for differential expression analysis of  
409 digital gene expression data. *Bioinformatics* **26**, 139–140 (2010).

- 410 7. Anders, S. & Huber, W. Differential expression analysis for sequence count data. *Genome Biol.*  
411 **11**, R106 (2010).
- 412 8. Love, M. I., Huber, W. & Anders, S. Moderated estimation of fold change and dispersion for  
413 RNA-seq data with DESeq2. *Genome Biol.* **15**, 550 (2014).
- 414 9. Schurch, N. J. *et al.* How many biological replicates are needed in an RNA-seq experiment and  
415 which differential expression tool should you use? *RNA* **22**, 839–851 (2016).
- 416 10. Sonesson, C. & Robinson, M. D. Bias, robustness and scalability in single-cell differential  
417 expression analysis. *Nat. Methods* **15**, 255–261 (2018).
- 418 11. Svensson, V., Vento-Tormo, R. & Teichmann, S. A. Exponential scaling of single-cell RNA-seq  
419 in the past decade. *Nature Protocols* vol. 13 599–604 (2018).
- 420 12. Zhang, J. M., Kamath, G. M. & Tse, D. N. Valid Post-clustering Differential Analysis for  
421 Single-Cell RNA-Seq. *Cell Syst.* **9**, 383-392.e6 (2019).
- 422 13. Zou, H. The Adaptive Lasso and Its Oracle Properties. (2006)  
423 doi:10.1198/016214506000000735.
- 424 14. De Micheli, A. J. *et al.* Single-Cell Analysis of the Muscle Stem Cell Hierarchy Identifies  
425 Heterotypic Communication Signals Involved in Skeletal Muscle Regeneration. *Cell Rep.* **30**,  
426 3583-3595.e5 (2020).
- 427 15. Motohashi, N. & Asakura, A. Muscle satellite cell heterogeneity and self-renewal. *Frontiers in*  
428 *Cell and Developmental Biology* vol. 2 (2014).
- 429 16. Lazure, F. *et al.* Myf6/MRF4 is a myogenic niche regulator required for the maintenance of the  
430 muscle stem cell pool. *EMBO Rep.* **21**, 1–19 (2020).
- 431 17. Wróbel, E., Brzóska, E. & Moraczewski, J. M-cadherin and  $\beta$ -catenin participate in  
432 differentiation of rat satellite cells. *Eur. J. Cell Biol.* **86**, 99–109 (2007).

- 433 18. Conerly, M. L., Yao, Z., Zhong, J. W., Groudine, M. & Tapscott, S. J. Distinct Activities of Myf5  
434 and MyoD Indicate Separate Roles in Skeletal Muscle Lineage Specification and Differentiation.  
435 *Dev. Cell* **36**, 375–385 (2016).
- 436 19. Uezumi, A. *et al.* Cell-Surface Protein Profiling Identifies Distinctive Markers of Progenitor Cells  
437 in Human Skeletal Muscle. *Stem Cell Reports* **7**, 263–278 (2016).
- 438 20. Barruet, E. *et al.* Functionally heterogeneous human satellite cells identified by single cell RNA  
439 sequencing. *Elife* **9**, (2020).
- 440 21. Camps, J. *et al.* Interstitial Cell Remodeling Promotes Aberrant Adipogenesis in Dystrophic  
441 Muscles. *Cell Rep.* **31**, (2020).
- 442 22. Fukada, S. *et al.* Molecular Signature of Quiescent Satellite Cells in Adult Skeletal Muscle. *Stem*  
443 *Cells* **25**, 2448–2459 (2007).
- 444 23. Szklarczyk, D. *et al.* STRING v11: Protein-protein association networks with increased coverage,  
445 supporting functional discovery in genome-wide experimental datasets. *Nucleic Acids Res.* **47**,  
446 D607–D613 (2019).
- 447 24. Fortier, S., MacRae, T., Bilodeau, M., Sargeant, T. & Sauvageau, G. Haploinsufficiency screen  
448 highlights two distinct groups of ribosomal protein genes essential for embryonic stem cell fate.  
449 *Proc. Natl. Acad. Sci. U. S. A.* **112**, 2127–2132 (2015).
- 450 25. Khajuria, R. K. *et al.* Ribosome Levels Selectively Regulate Translation and Lineage  
451 Commitment in Human Hematopoiesis. *Cell* **173**, 90-103.e19 (2018).
- 452 26. Guthikonda, P. K. *et al.* Polymorphic dynamics of ribosomal proteins gene expression during  
453 somatic cell reprogramming and their differentiation in to specialized cells-types. *bioRxiv* 114868  
454 (2017) doi:10.1101/114868.
- 455 27. Figueiredo, V. C. & McCarthy, J. J. Regulation of ribosome biogenesis in skeletal muscle  
456 hypertrophy. *Physiology* vol. 34 30–42 (2019).

- 457 28. Guyon, I., Weston, J., Barnhill, S. & Vapnik, V. Gene selection for cancer classification using  
458 support vector machines. *Mach. Learn.* **46**, 389–422 (2002).
- 459 29. Lopes, M. B. & Vinga, S. Tracking intratumoral heterogeneity in glioblastoma via regularized  
460 classification of single-cell RNA-Seq data. *BMC Bioinformatics* **21**, 1–12 (2020).
- 461 30. Freijeiro-González, L., Febrero-Bande, M. & González-Manteiga, W. A critical review of  
462 LASSO and its derivatives for variable selection under dependence among covariates. (2020).
- 463 31. Bertsimas, D., King, A. & Mazumder, R. Best subset selection via a modern optimization lens.  
464 *Ann. Stat.* **44**, 813–852 (2016).
- 465 32. Deng, H. & Runger, G. Gene selection with guided regularized random forest. *Pattern Recognit.*  
466 **46**, 3483–3489 (2013).
- 467 33. Ntranos, V., Yi, L., Melsted, P. & Pachter, L. A discriminative learning approach to differential  
468 expression analysis for single-cell RNA-seq. *Nat. Methods* **16**, 163–166 (2019).
- 469 34. McInnes, L., Healy, J. & Melville, J. UMAP: Uniform Manifold Approximation and Projection  
470 for Dimension Reduction. *arXiv* (2018).
- 471 35. Blondel, V. D., Guillaume, J. L., Lambiotte, R. & Lefebvre, E. Fast unfolding of communities in  
472 large networks. *J. Stat. Mech. Theory Exp.* **2008**, (2008).
- 473 36. CSARDI & G. The igraph software package for complex network research. *InterJournal*  
474 *Complex Syst.* **1695**, (2006).
- 475 37. Friedman, J., Hastie, T. & Tibshirani, R. Regularization paths for generalized linear models via  
476 coordinate descent. *J. Stat. Softw.* **33**, 1–22 (2010).
- 477 38. Love, M. I., Huber, W. & Anders, S. Moderated estimation of fold change and dispersion for  
478 RNA-seq data with DESeq2. *Genome Biol.* **15**, 550 (2014).
- 479
